# Supplementary material for: Application of BiOX Photocatalyst to Activate Peroxydisulfate Ion-Investigation of a Combined Process for the Removal of Organic Pollutants from Water
Source: MDPI journal article supplement (doi:10.3390/catal13030513), 2023-03-02
Supplement: s1 [file s1]

Archive with 1 entries (1 files):
- catalysts-2196743-supplementary.pdf
