# Supplementary material for: Application of BiOX Photocatalyst to Activate Peroxydisulfate Ion-Investigation of a Combined Process for the Removal of Organic Pollutants from Water
Source: MDPI journal article supplement (doi:10.3390/catal13030513), 2023-03-02
Supplement: s1 [file s1 › catalysts-2196743-supplementary.pdf]

## Supplementary Materials

### Application of BiOX Photocatalyst to Activate Peroxydisulfate Ion-Investigation of a Combined Process for the Removal of Organic Pollutants from Water

Tünde Alapi <sup>1,\*</sup>, Bence Veres <sup>1</sup>, Máté Náfrádi <sup>1</sup>, Luca Farkas <sup>1</sup>, Zsolt Pap <sup>2</sup> and Anett Covic <sup>1</sup>

<sup>1</sup> Department of Inorganic and Analytical Chemistry, University of Szeged, Dóm Square 7, H-6720 Szeged, Hungary

<sup>2</sup> Applied & Environmental Chemistry Department, University of Szeged, Rerrich Béla Square 1, H-6720 Szeged, Hungary

\* Correspondence: alapi@chem.u-szeged.hu

**Table S1.** The parameters of the biologically treated domestic wastewater

| Parameter                                 | Value |
|-------------------------------------------|-------|
| pH                                        | 7.8   |
| Conductivity ( $\mu\text{S cm}^{-1}$ )    | 1260  |
| COD ( $\text{mg L}^{-1}$ )                | 24    |
| TOC ( $\text{mg L}^{-1}$ )                | 6.2   |
| NH <sub>4</sub> -N ( $\text{mg L}^{-1}$ ) | <0.4  |
| NO <sub>3</sub> ( $\text{mg L}^{-1}$ )    | 3.4   |
| Cl ( $\text{mg L}^{-1}$ )                 | 120   |
| HCO <sub>3</sub> ( $\text{mg L}^{-1}$ )   | 103   |

**Table S2.** The name, manufacturer, and purity of the used materials

| Name                                                  |                 | Purity        |
|-------------------------------------------------------|-----------------|---------------|
| Milli-Q, high-purity water                            | Merck Millipore |               |
| Bi(NO <sub>3</sub> ) <sub>3</sub> ·5 H <sub>2</sub> O | Alfa Aesar      | 98%           |
| KI, KCl, KBr                                          | Molar Chemicals | 99.7%         |
| Ethylene-glycol                                       | Sigma-Aldrich   | 99.95%        |
| Ethanol                                               | VWR             | 99.9%         |
| 1,4-benzoquinone (BQ)                                 | Across Organics | 99%           |
| 1,4-hydroquinone (HQ)                                 | Sigma Aldrich   | 99%           |
| Sulfamethoxypyridazine (SMP)                          | Fluka           | 99%           |
| Trimethoprim (TRIM)                                   | Sigma Aldrich   | 99%           |
| Nitrogen gas                                          | Messer Hungary  | 99.995%       |
| Air                                                   | Messer Hungary  | medical grade |
| Methanol                                              | VWR             | 99.8%         |
| Acetonitrile                                          | VWR             | 99.8%         |
| Ammonium-formate                                      | VWR             | ≥99%          |
| HCOOH                                                 | VWR             | 100%          |
| Na <sub>2</sub> S <sub>2</sub> O <sub>8</sub> (PDS)   | VWR             | 98%           |
| Na <sub>2</sub> S <sub>2</sub> O <sub>3</sub>         | VWR             | 98%           |

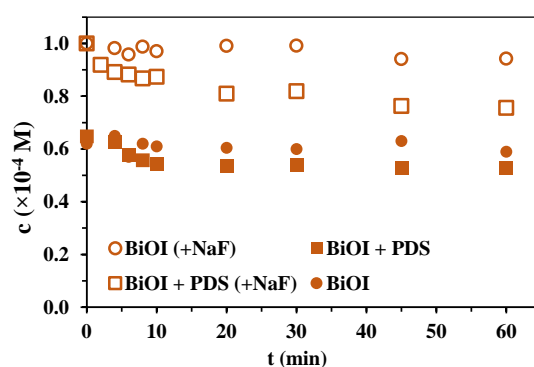

**Figure S1.** The transformation of TRIM in aerated BiOI suspensions, irradiated with Vis LED ( $c_0(\text{TRIM}) = 1.0 \times 10^{-4} \text{ M}$ ;  $c_0(\text{SMP}) = 1.0 \times 10^{-4} \text{ M}$ ; NaF was added for desorption).

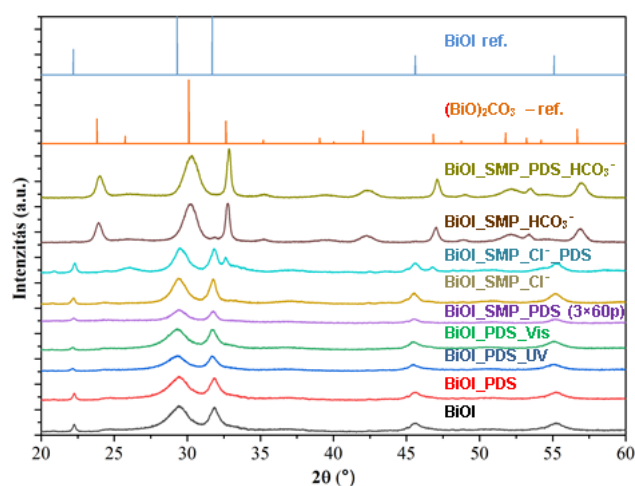

**Figure S2.** The Effect of PDS, inorganic ions, and SMP on the XRD diffractogram of BiOI photocatalysts under UV and Vis radiation in aerated suspensions.

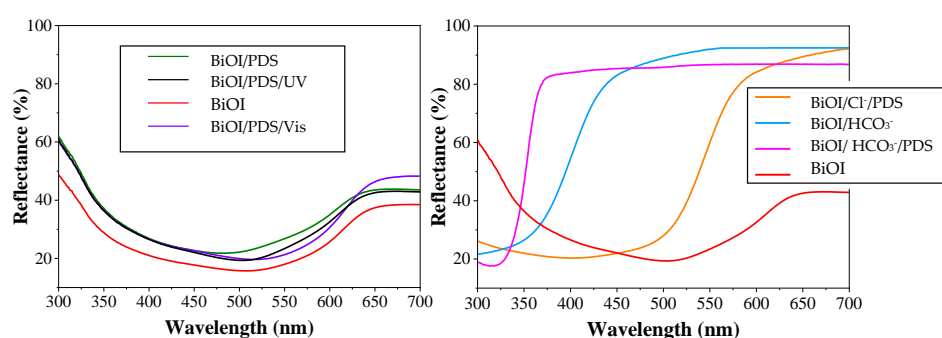

**Figure S3.** The Effect of PDS and inorganic ions on the DRS spectra diffractogram of BiOI photocatalysts under UV and Vis radiation in aerated suspensions.

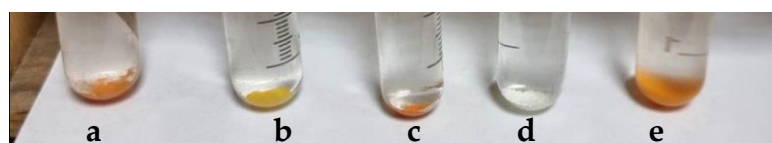

**Figure S4.** The effect of pH and inorganic ions on the color of BiOI suspension (a: Milli-Q; b: biologically treated domestic wastewater, pH = 7.8; c: biologically treated domestic wastewater, pH = 4; d:  $\text{HCO}_3^-$  solution; e: the pH of the  $\text{HCO}_3^-$  solution was adjusted to 4 and stirred for 10 minutes, before suspending the BiOI)
